# Supplementary material for: Declining trend in HIV new infections in Guangxi, China: insights from linking reported HIV/AIDS cases with CD4-at-diagnosis data
Source: Springer Nature journal article supplement (doi:10.1186/s12889-020-09021-9), 2020-06-12
Supplement: MOESM4 [file 18078264]

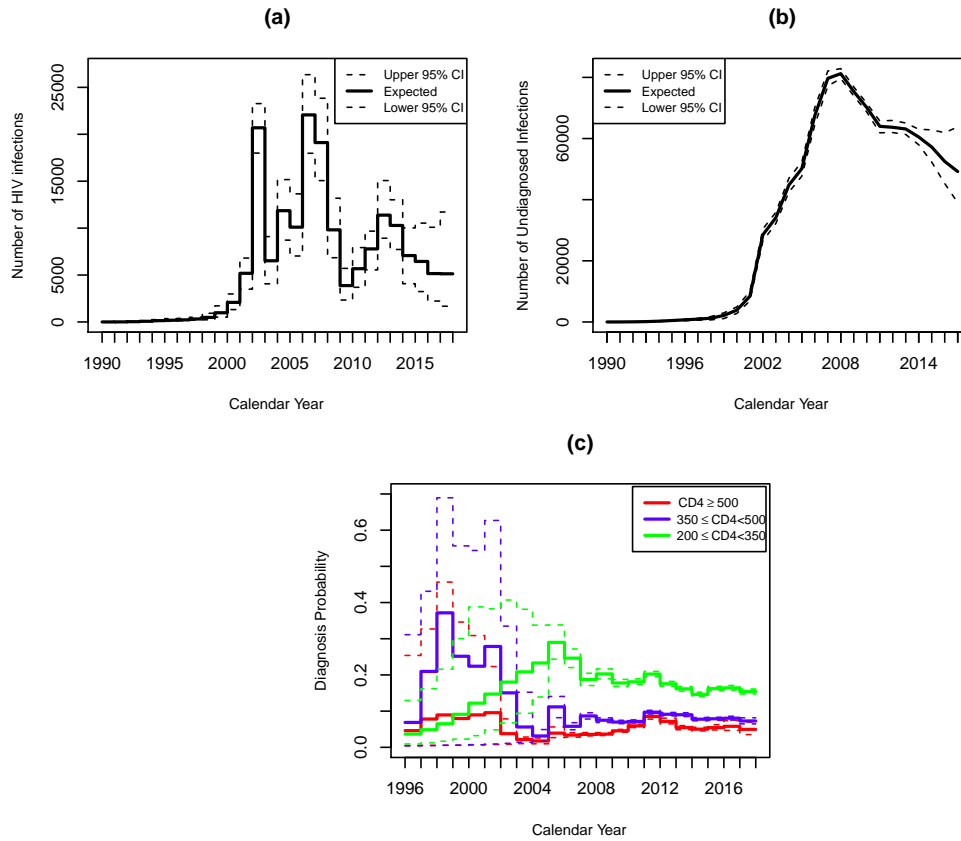

Fig. S3: Yearly new infections (a) undiagnosed prevalence (b) and diagnosis probabilities (c) from 1990 to 2017 (estimated by method 1). The dotted lines give the 95% CI.
