# Supplementary material for: Declining trend in HIV new infections in Guangxi, China: insights from linking reported HIV/AIDS cases with CD4-at-diagnosis data
Source: Springer Nature journal article supplement (doi:10.1186/s12889-020-09021-9), 2020-06-12
Supplement: MOESM5 [file 18078264]

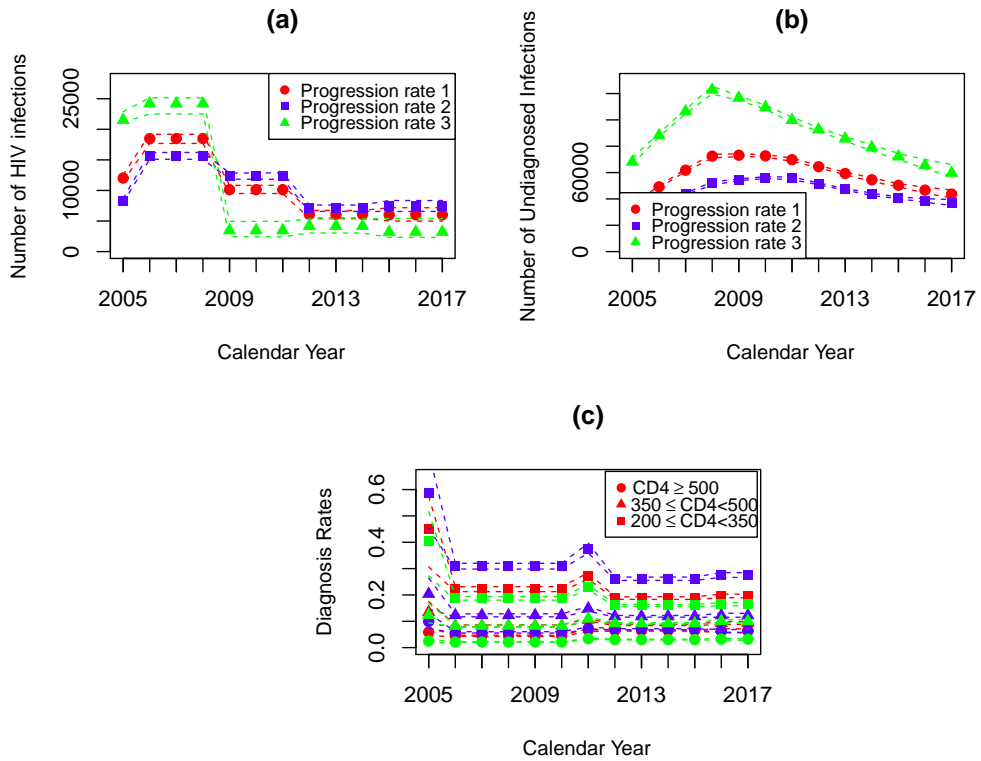

Fig. S4: The comparison of new infections (a), undiagnosed infections (b), and diagnosis rates (c) by three different groups of progression rates (estimated by method 2). The waiting time in each CD4 stage for red, blue and green are PR1:3, 3, 3; PR2: 2.56, 2.17, 2.16 and PR3: 6.37, 2.86 3.54, respectively. The dotted lines give the 95% CI.
